# Supplementary material for: Harnessing the photo-acidity of organic dyes for the development of ring-opening polymerization of lactones under visible light
Source: Royal Society of Chemistry journal article supplement (doi:10.1039/d3py00530e), 2023-01-01
Supplement: d3py00530e1.pdf [file d3py00530e1.pdf]

## Supporting Information

### **Harnessing the photo-acidity of organic dyes for the development of ring-opening polymerization of lactones under visible light**

Zhaogang Liu,<sup>a</sup> Xun Zhang,<sup>a,b</sup> Pan Sun,<sup>a</sup> Junwei Han<sup>a</sup> and Saihu Liao<sup>\*a,c</sup>

<sup>a</sup> Key Laboratory of Molecule Synthesis and Function Discovery (Fujian Province University), College of Chemistry Fuzhou University

<sup>b</sup> Department State Key Laboratory of Organometallic Chemistry, Shanghai Institute of Organic Chemistry Chinese Academy of Sciences, Lingling Lu, Shanghai, 200032, China

<sup>c</sup> State Key Laboratory of Physical Chemistry of Solid Surfaces, Xiamen University, Xiamen 361005, PR China, E-mail: shliao@xmu.edu.cn

# Table of Contents

|                                                                                                                         |   |
|-------------------------------------------------------------------------------------------------------------------------|---|
| Photoreaction setup.....                                                                                                | 3 |
| Typical procedure for star type block polymer synthesis.....                                                            | 4 |
| Typical procedure for the light “ON”/ “OFF” experiments.....                                                            | 5 |
| Polymerization in the dark or under blue LEDs.....                                                                      | 6 |
| Polymerization kinetics of the ring-opening polymerization of $\epsilon$ -caprolactone driven by dyes as Photoacid..... | 7 |
| Acetalization reactions under blue Light by using Dye <b>1</b> as photocatalyst.....                                    | 7 |
| The pH change of the solution of Dye <b>1</b> before and after irradiation..                                            | 8 |
| UV-Vis spectrum of organic dyes.....                                                                                    | 8 |

## Photoreaction setup

The ROP were conducted in blue or purple photo-reactors (purchased from <http://www.geaochem.com/>), equipped with a fan for keeping at room temperature and six 1W LEDs beads dispersed inside the photo-reactor. The average power output from the reactor was  $\sim 30 \text{ mW/cm}^2$  as recorded.

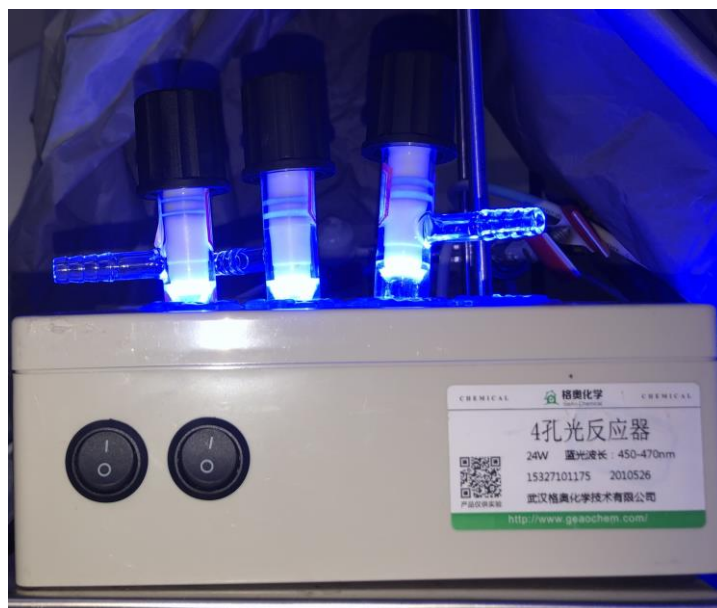

**Fig. S1.** Blue photo-reactors used in this work ( $\lambda$  450-470 nm).

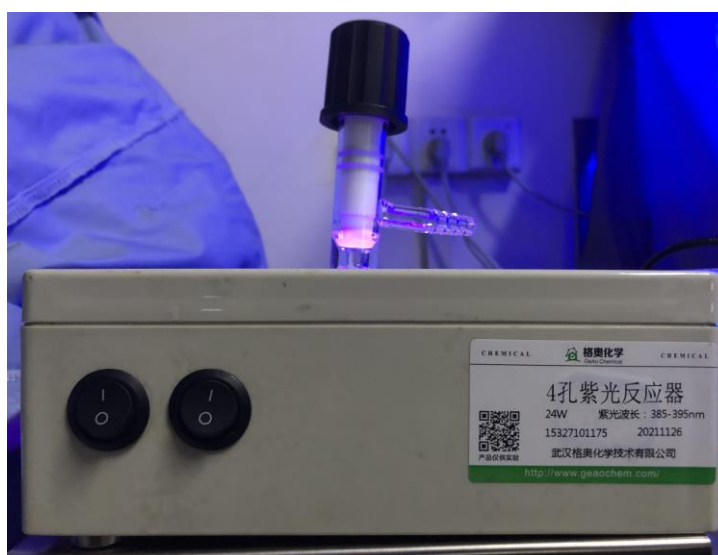

**Fig. S2.** Purple photo-reactors used in this work ( $\lambda$  385-395 nm).

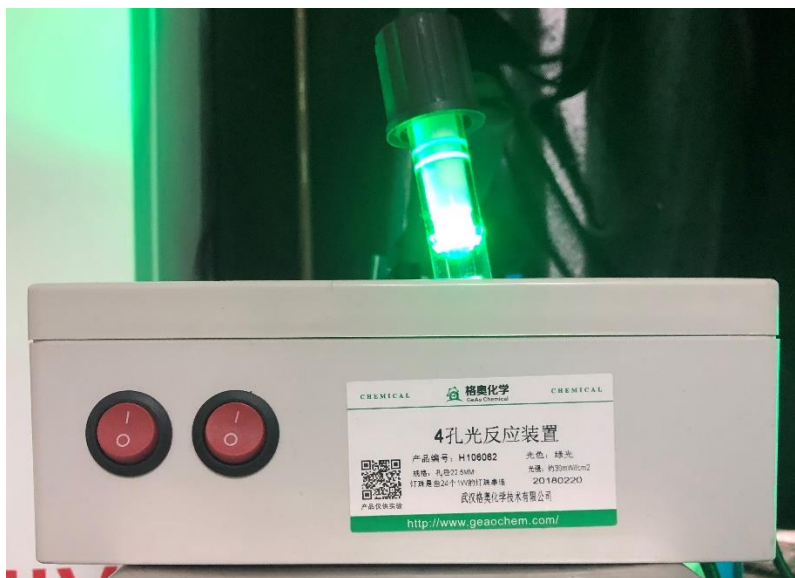

**Fig. S3.** Green photo-reactors used in this work ( $\lambda$  490-530 nm).

## Typical procedure for star type block polymer synthesis

In a glovebox,  $\epsilon$ -caprolactone ( $\epsilon$ -CL) (119.7 mg, 1.05 mmol, 35 equiv.) was added via a syringe in toluene ( $[\delta\text{-VL}]_0 = 3.0 \text{ mol L}^{-1}$ ) in a Schlenk tube (after dried by flame for three times), trimethylol propane (4.0 mg, 30  $\mu\text{mol}$ , 1 equiv.) was added in the system and bromocresol green (Dye **1**, 2.1 mg, 3.0  $\mu\text{mol}$ , 0.1 equiv.) was weighed in a Schlenk tube. The solution was stirred and irradiated at 30 mW/cm<sup>2</sup> blue light reactor at room temperature. After 24 h, a little portion of the system was characterized by NMR and GPC (PCL, Conv. = 96%,  $M_{n,\text{NMR}} = 3.900 \text{ kg/mol}$ ,  $D = 1.08$ ), 50 equivalents of  $\delta$ -VL were added to the ROP system. After another 36 hours, a portion of the ROP mixtures was syringed out and quenched with a few drops of triethylamine for checking the monomer conversion by <sup>1</sup>H NMR. The final product (PCL-*b*-PVL,  $M_{n,\text{NMR}} = 8.9 \text{ kg/mol}$ ,  $D = 1.10$ ) was obtained after precipitation using DCM as a good solvent and cold methanol as a poor solvent.

## Typical procedure for the light “ON”/ “OFF” experiments

In a glovebox,  $\delta$ -valerolactone ( $\delta$ -VL) (150.0 mg, 1.5 mmol, 50 equiv.) was added via a syringe in DCM ( $[\delta\text{-VL}]_0 = 0.5 \text{ mol L}^{-1}$ ) in a Schlenk tube (after dried by flame for three times), 3-phenyl-1-propanol (PPA, 4.1 mg, 30  $\mu\text{mol}$ , 1 equiv.) was added in the system and bromocresol green (Dye **1**, 2.1 mg, 3  $\mu\text{mol}$ , 0.1 equiv.) was weighed in a Schlenk tube. The solution was stirred and irradiated with the 30 mW/cm<sup>2</sup> blue LED reactor at room temperature for 9h. Upon removing the blue light, a little portion of the system was characterized by <sup>1</sup>H NMR for checking the monomer conversion. During the dark period of 14 hours, the monomer conversion was followed by <sup>1</sup>H NMR. Then, the ROP system was placed under the irradiation of blue light again for another 10 hours and the end up monomer conversion was also determined by <sup>1</sup>H NMR.

# Polymerization in the dark or under blue LEDs

**Table S1** Visible light-regulated ROP of lactones by using organic dyes molecules as catalysts.<sup>a</sup>

Ph-CH<sub>2</sub>-CH<sub>2</sub>-CH<sub>2</sub>-OH + O=C1OCCCCO1  $\xrightarrow[\text{DCM, r.t.}]{\text{visible light (Dye)}}$  Ph-CH<sub>2</sub>-CH<sub>2</sub>-CH<sub>2</sub>-O-(O=C1OCCCCO1)<sub>n</sub>-H

Bromocresol green (Dye 1)

Fluorescein (Dye 2)

Eosin Y (Dye 3)

Erythrosin B (Dye 4)

Rhodamine 6G (Dye 5)

Rhodamine B (Dye 6)

Isatin (Dye 7)

Pigment red 122 (Dye 8)

| Entry | Dye   | $\lambda$ (nm) <sup>b</sup> | Conv. | $M_{n,theo}$ (kg/mol) <sup>c</sup> | $M_{n,NMR}$ (kg/mol) | $\bar{D}$ <sup>d</sup> |
|-------|-------|-----------------------------|-------|------------------------------------|----------------------|------------------------|
| 1     | Dye 1 | 460                         | 90%   | 4.6                                | 4.5                  | 1.10                   |
| 2     | Dye 1 | / <sup>e</sup>              | /     | /                                  | /                    | /                      |
| 3     | Dye 2 | 460                         | 88%   | 4.5                                | 4.5                  | 1.09                   |
| 4     | Dye 2 | /                           | 2%    | 0.2                                | 0.2                  | /                      |
| 5     | Dye 3 | 460                         | 4%    | 0.3                                | 0.3                  | /                      |
| 6     | Dye 3 | /                           | < 1%  | /                                  | /                    | /                      |
| 7     | Dye 4 | 460                         | 5%    | 0.4                                | 0.3                  | /                      |
| 8     | Dye 4 | /                           | < 1%  | /                                  | /                    | /                      |
| 9     | Dye 5 | 460                         | < 1%  | /                                  | /                    | /                      |
| 10    | Dye 5 | /                           | < 1%  | /                                  | /                    | /                      |
| 11    | Dye 6 | 460                         | < 1%  | /                                  | /                    | /                      |
| 12    | Dye 6 | /                           | < 1%  | /                                  | /                    | /                      |
| 13    | Dye 7 | 460                         | < 1%  | /                                  | /                    | /                      |
| 14    | Dye 7 | /                           | < 1%  | /                                  | /                    | /                      |
| 15    | Dye 8 | 460                         | < 1%  | /                                  | /                    | /                      |
| 16    | Dye 8 | /                           | < 1%  | /                                  | /                    | /                      |

<sup>a</sup>  $[M]_0/[I]_0/[Dye]_0 = [\delta-VL]_0/[PPA]_0/[Dye]_0 = 50:1:0.1$ , light irradiation for 24 hours,  $[M]_0 = 3 \text{ mol L}^{-1}$ , Conv. and  $M_{n,NMR}$  were determined by <sup>1</sup>H NMR; <sup>b</sup> The wavelength of visible light from LEDs reactor (6 W). <sup>c</sup>  $M_{n,theo} = [M]_0/[I]_0 \times MW_{[M]} \times \text{Conv.} + MW_{[I]}$ , where  $MW_{[M]}$  and  $MW_{[I]}$  represent the molar mass of monomer and the molar mass of initiator, respectively; <sup>d</sup> Determined by GPC using polystyrene standards; <sup>e</sup> In the dark.

Polymerization kinetics of the ring-opening polymerization of  $\epsilon$ -caprolactone driven by dyes as Photoacid.

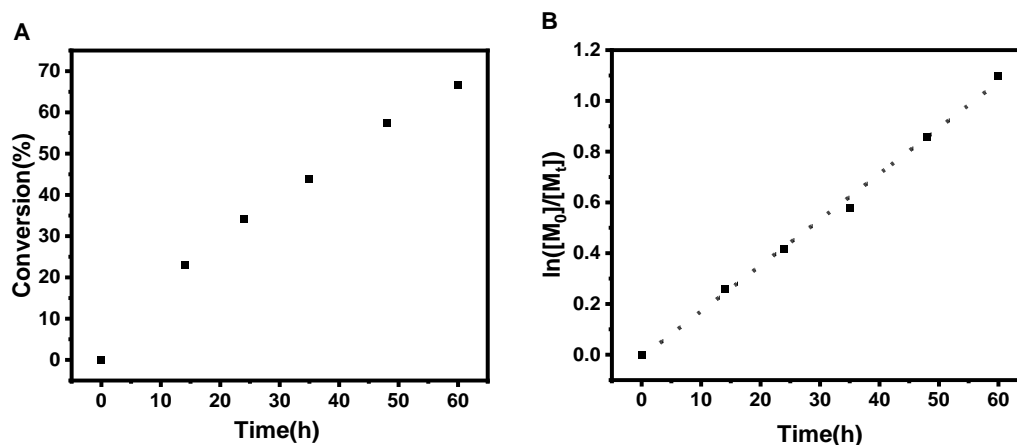

**Fig. S4.** Kinetic plots for the polymerization of  $\epsilon$ -caprolactone with  $[\epsilon\text{-CL}]_0 / [\text{PPA}]_0 / [\text{Dye } 1]_0$  at the ratio of 50/1/0.1 at room temperature. (A) Monomer conversion at different times. (B)  $\ln([M]_0/[M]_t)$  versus time.

Acetalization reactions under blue Light by using Dye 1 as photocatalyst

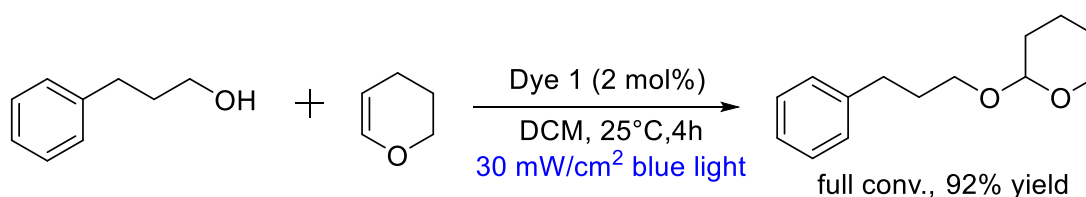

Furthermore, we tried a small molecule synthesis reaction by using Dye 1 (2 mol%) as the photoacid catalyst under blue light irradiation. The reaction between 3-phenyl-1-propanol and 3,4-dihydropyran reached a full conversion after irradiation for 4 h. The target product, 3-phenylpropyl tetrahydropyranyl ether, was isolated in 92% yield by column and characterized by <sup>1</sup>H NMR (Figure S4). This reaction is a classic acetalization reaction which is a typical type of reaction catalyzed by acid, suggesting acid species

was generated with Dye 1 under irradiation of blue light.

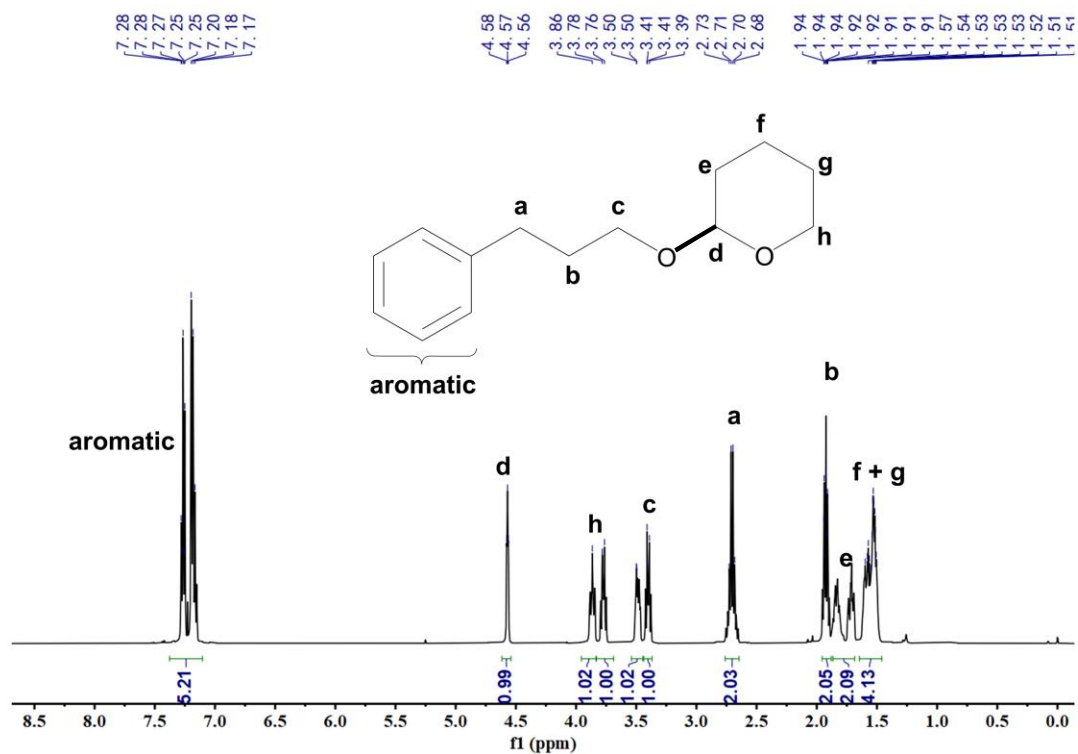

Fig. S5. <sup>1</sup>H NMR analysis for acetalization product.

The pH change of the solution of Dye 1 before and after irradiation

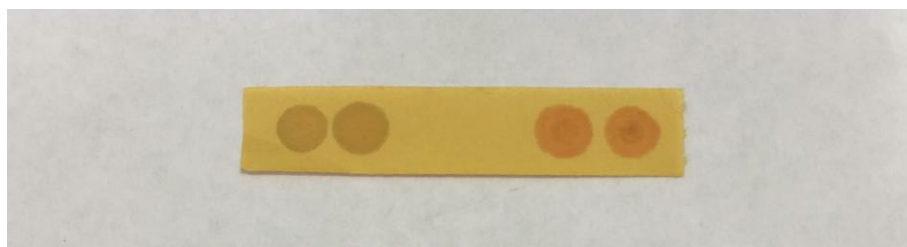

Fig. S6. The pH change of Dye 1 in DCM ([Dye 1] = 6 mmol L<sup>-1</sup>) before (left) and after (right) blue light irradiation for 3 hours.

UV-Vis spectrum of organic dyes



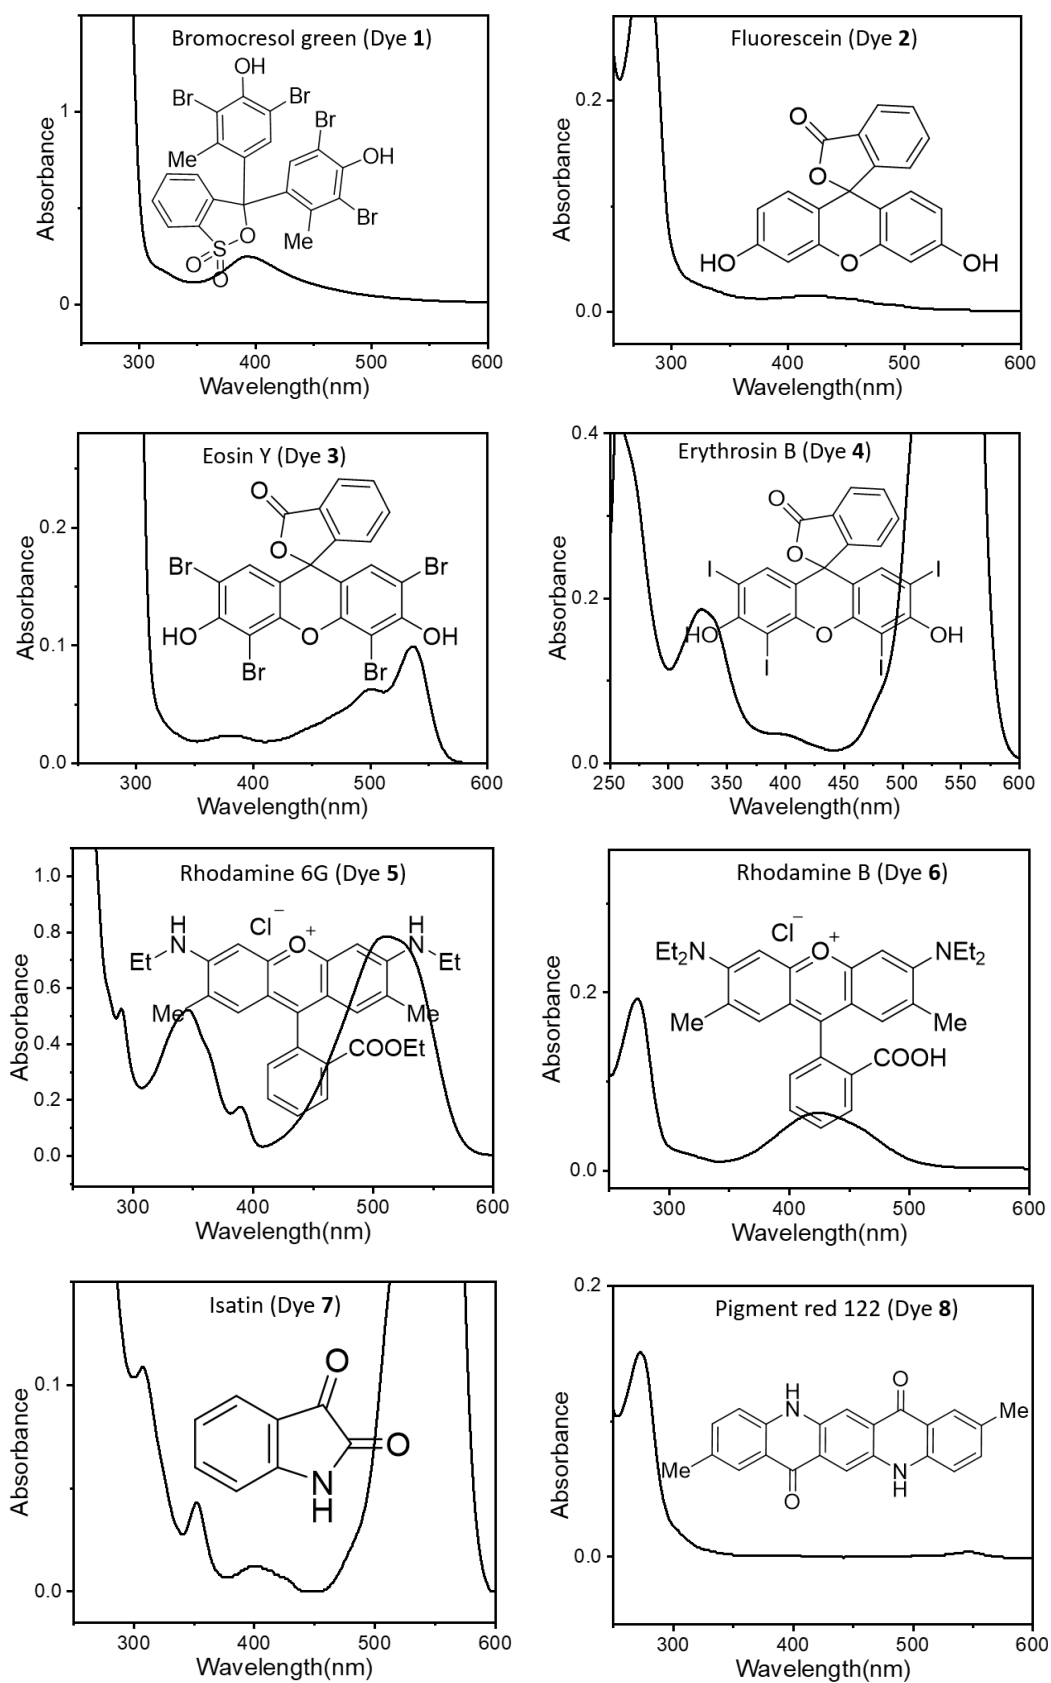

**Fig. S7.** The UV-Vis spectra of organic dyes in DCM (Dye 4 was measured in DMSO, in some cases, ring-opened forms could also contribute to the observed absorption)
